# Supplementary material
Source: publisher figshare collection journal article supplement (https://acs.figshare.com/ndownloader/files/4013506)
Supplement: Supplementary file 1 [file 4013506]

# ***In-situ* Transmission Electron Microscopy Observations of Sublimation in Silver Nanoparticles**

**Michael A. Asoro<sup>1</sup>, Desiderio Kovar<sup>1, 2</sup>, Paulo J. Ferreira<sup>1, 2</sup>**

<sup>1</sup>Materials Science and Engineering Program and <sup>2</sup>Department of Mechanical Engineering,

University of Texas at Austin, Austin, TX 78712, USA

## Appendix: Derivation of Sublimation Energy for Facetted and Unfacetted Particles

Consider state 1 as a spherical particle of radius  $r_1$ . The total energy of the particle,  $E_1$ , is given by,  $E_1 = \gamma_s (4 \pi r_1^2) + V(G_{vs}) = \gamma_s (4 \pi r_1^2) + (4/3 \pi r_1^3 G_{vs})$ , where  $V$  = volume of the sphere and  $G_{vs}$  is the volume free energy of the solid.

If the particle facets by splitting into two  $\{111\}$  facetted particles of size  $x$  and  $2r_1 - x$  as shown below, the total energy is given by  $E_2 = \gamma_s(4\pi r_1^2) + 2\gamma_{s111}A_{111} + (4/3 \pi r_1^3 G_{vs})$

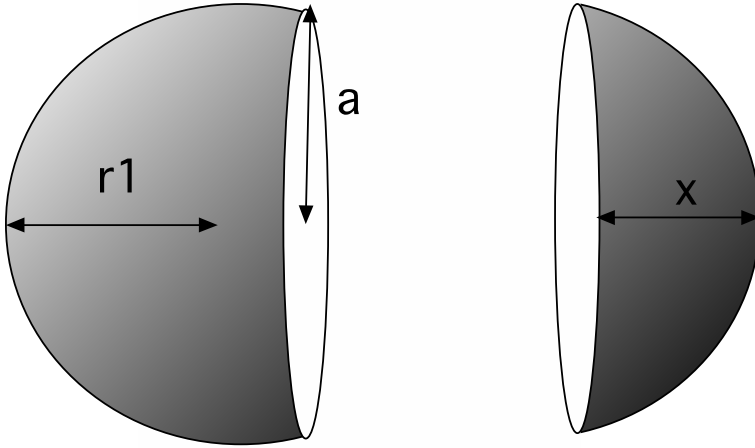

To determine  $A_{111}$ , we note that the radius of the white circular facetted region,  $a$ ,  $= [(2r_1x) - x^2]^{1/2}$ . Thus,  $E_2 = \gamma_s(4\pi r_1^2) + 2\pi\gamma_{s111} [(2r_1x) - x^2] + (4/3 \pi r_1^3 G_{vs})$ .

Then, if the smaller facetted particle on the right subsequently sublimates, then the total energy of the system  $= E_3$  = surface energy of larger facetted particle + volume energy of larger facetted particle + volume energy of smaller facetted particle (which now consists of vapor and therefore has no interfacial area).

The surface area of the smaller particle is  $2 \pi r_1 x$ , not counting the white facetted portion, and the volume of the smaller particle is  $1/6 \pi x (3a^2 + x^2) = (\pi) (r_1 x^2 - x^3/3)$

$E_3 = \{[\gamma_s[(4\pi r_1^2) - 2 \pi r_1 x] + \pi\gamma_{s111} [(2r_1x) - x^2]] + \{G_{vs} [(4/3 \pi r_1^3) - (\pi)(r_1 x^2 - x^3/3)]\} + \{G_{vv} [(\pi)(r_1 x^2 - x^3/3)]\}$ , where  $G_{vv}$  is the volume free energy of the vapor.

The change in energy on going from state 1  $\rightarrow$  3 is  $\Delta E_f = E_3 - E_1$ . Thus,

$$\Delta E_f = \pi\gamma_{s111} (2r_1x - x^2) - 2 \pi\gamma_s r_1 x + (G_{vv} - G_{vs})(\pi r_1 x^2) - (G_{vv} - G_{vs}) \pi x^3/3$$

If  $E_{sub} \stackrel{\text{def}}{=} G_{vs} - G_{vv}$ , then

$$\Delta E_f = \pi \gamma_{s111} (2r_1 x - x^2) - 2 \pi \gamma_s r_1 x + E_{sub} \left( \frac{\pi x^3}{3} - \pi r_1 x^2 \right)$$

The relevant comparison is to compare  $\Delta E_f$  above to the energy change for the uniform sublimation,  $\Delta E_f$ , for a spherical particle with radius  $r_1$  to a smaller spherical particle  $r_2$  where the smaller spherical particle has the same volume as the larger faceted particle above.

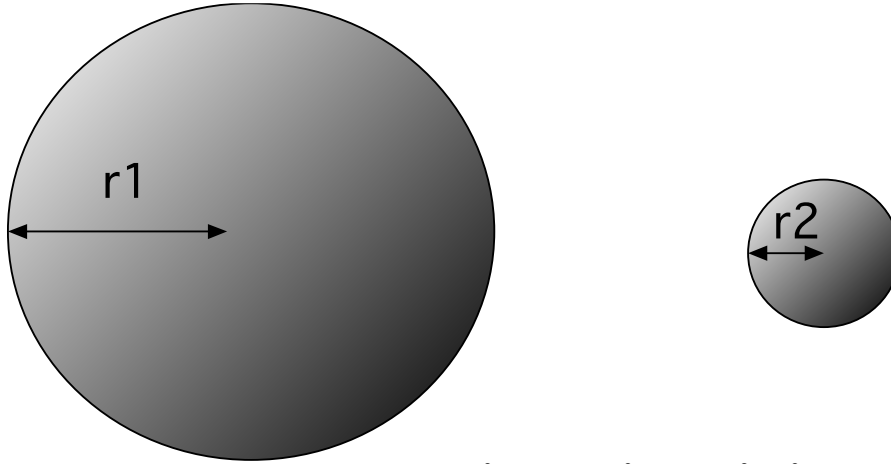

To determine  $r_2$ , we note that  $\frac{4}{3} \pi r_2^3 = \frac{4}{3} \pi r_1^3 - (\pi)(r_1 x^2 - x^3/3) \rightarrow r_2 = [r_1^3 - \frac{3}{4} r_1 x^2 - x^3/(4\pi)]^{1/3}$ . The energy change for going from the large to the small particle by uniform sublimation is then given by,

$$\Delta E_{nf} = \{ \gamma_s (4 \pi r_2^2) + G_{vs} (\frac{4}{3} \pi r_2^3) + G_{vv} [(\frac{4}{3} \pi r_2^3 - \frac{4}{3} \pi r_1^3)] \} - [ \gamma_s (4 \pi r_1^2) + (\frac{4}{3} \pi r_1^3 G_{vs}) ]$$

Again, defining  $E_{sub} \stackrel{\text{def}}{=} G_{vs} - G_{vv}$ ,  $\rightarrow$

$$\Delta E_{nf} = \{ 4 \pi \gamma_s (r_2^2 - r_1^2) + \frac{4}{3} \pi E_{sub} (r_2^3 - r_1^3) \} \text{ where } r_2 = [r_1^3 - \frac{3}{4} (r_1 x^2 - x^3/(4\pi))]^{1/3}$$

We use the following values for material properties of Ag,  $\gamma_s = 1.2 \text{ J/m}^2$ ,  $\gamma_{\{111\}} = 0.62 \text{ J/m}^2$ ,  $E_{sub} = 284 \text{ KJ/mol} = 2.765 \times 10^{10} \text{ J/m}^3$  (this is temperature dependent), and use these to calculate the change in energy for different values of  $x/r$  and  $r$ .
